# Supplementary material for: Molecular-Simulation–Inspired Synthesis of [6]-Prismane via Photoisomerisation of Octafluoro[2.2]paracyclophane
Source: MDPI journal article supplement (doi:10.3390/molecules29040783), 2024-02-08
Supplement: s1 [file s1]

Supplementary Information

**Molecular Simulation–Inspired Synthesis of [6]-Prismane via the  
Photoisomerisation of Octafluoro[2.2]paracyclophane**

Yoichi Hosokawa<sup>1\*</sup>, Shuji Kajiya<sup>1</sup>, Ayako Ohshima<sup>1</sup>, Satoshi Kawata<sup>2</sup>, Nobuhiro Ishida<sup>1</sup>, and  
Arimitsu Usuki<sup>1</sup>

<sup>1</sup>*Toyota Central R&D Labs., Inc., 41-1, Yokomichi, Nagakute, Aichi 480-1192, Japan*

<sup>2</sup>*Department of Chemistry, Faculty of Science, Fukuoka University, 19-1 Nanakuma 8-Chome, Jonan-ku, Fukuoka  
814-0180, Japan*

## Contents

**Figure S1.** Calculation flow chart.

**Figure S2.** Results of molecular mechanics calculations performed for [6]-prismane derivatives.

**Figure S3.** Heat of Formation for selected prismane derivatives and their precursors.

**Figure S4.** C···C distances in **11** optimised by MOPAC PM7.

**Figure S5.** Highest occupied molecular orbital (HOMO)–LUMO gaps of selected cyclophanes.

**Figure S6.**  $^1\text{H}$  NMR spectra (400 MHz,  $\text{CD}_3\text{CN}/\text{D}_2\text{O}/(\text{CD}_3)_2\text{SO} = 2/1/8$ , v/v/v) of **10** recorded after (a) 15 and (b) 45 min irradiation.

**Figure S7.** Ultraviolet (UV)–Vis spectra of selected reaction systems.

**Figure S8.**  $^{19}\text{F}$  NMR spectra (373 MHz) of **10** photoirradiated in different solvents.

**Figure S9.** NMR spectra (400 MHz) of **10** in (a)  $\text{CD}_3\text{CN}/\text{D}_2\text{O}/\text{DMSO}-d_6$  and (b)  $\text{D}_2\text{O}/\text{DMSO}-d_6$ .

**Figure S10.**  $^{19}\text{F}$  NMR spectra (373 MHz) of the photoreaction mixture recorded before and after heating.

**Figure S11.**  $^{13}\text{C}$  NMR spectra (100 MHz) of (a) cyclophane **10**, (b) reaction solution after UV irradiation, and (c) evaporated reaction solution.

**Figure S12.**  $^{19}\text{F}$  NMR spectra (373 MHz) of the reaction solution kept under vacuum for (a) 0, (b) 2, and (c) 10 min.

**Figure S13.** NMR spectra of cyclophane **10** assigned by ROYAL probe HFX at 25 °C.

**Figure S14.** NMR spectra of **11** by ROYAL probe HFX at 25 °C.

**Figure S15.** ORTEP drawing of **10** (50% probability).

**Figure S16.** (a) Single-molecule and (b) packing (*a*-axis) structures of **10**.

**Figure S17.** Infrared spectra of **10** and the recovered precipitate.

**Figure S18.**  $^{19}\text{F}$  NMR (373 MHz) spectrum of the photoreaction solution with a  $\text{CFCl}_3$  standard.

**Table S1.** Cartesian coordinates of the PM7 optimized geometry of norbornadiene **12** (in Å).

**Table S2.** Cartesian coordinates of the PM7 optimized geometry of quadricyclane **13** (in Å).

**Table S3.** Cartesian coordinates of the PM7 optimized geometry of fluorinated norbornadiene **14** (in Å).

**Table S4.** Cartesian coordinates of the PM7 optimized geometry of fluorinated quadricyclane **15** (in Å).

**Table S5.** Cartesian coordinates of the PM7 optimized geometry of cyclophane **10** (in Å).

**Table S6.** Cartesian coordinates of the PM7 optimized geometry of prismane **11** (in Å).

**Table S7.** Cartesian coordinates of the PM7 optimized geometry of cyclophane **17** (in Å).

**Table S8.** Cartesian coordinates of the PM7 optimized geometry of cyclophane **16** (in Å).

◆ Chem3D ver. 15.1

◆ Material Studio ver. 7.0 DMol3

Structure  
Optimization

HOMO-LUMO Orbital Calculation

MM2 Initial Optimization

Task: Energy

↓ then

Functional: GGA-BLYP

MOPAC2016 PM7

Basis: DND

Properties: Fukui function, Orbitals, Population analysis

**Figure S1.** Calculation flow chart.

| Normal Prismane                                                                                                                                                                                                                                                                                                                                                                                                                                                                           |                                                                                     | Chair Form                                                                                                                                                                                                                                                                                                                                                                                                              |                                                                                      | Boat Form                                                                                                                                            |
|-------------------------------------------------------------------------------------------------------------------------------------------------------------------------------------------------------------------------------------------------------------------------------------------------------------------------------------------------------------------------------------------------------------------------------------------------------------------------------------------|-------------------------------------------------------------------------------------|-------------------------------------------------------------------------------------------------------------------------------------------------------------------------------------------------------------------------------------------------------------------------------------------------------------------------------------------------------------------------------------------------------------------------|--------------------------------------------------------------------------------------|------------------------------------------------------------------------------------------------------------------------------------------------------|
| •F <sub>12</sub> Form                                                                                                                                                                                                                                                                                                                                                                                                                                                                     | •[(CH <sub>2</sub> ) <sub>2</sub> ] <sub>2</sub> Form                               | •(CH <sub>3</sub> ) <sub>6</sub> Form                                                                                                                                                                                                                                                                                                                                                                                   | •(OMe) <sub>3</sub> (CN) <sub>3</sub> Form                                           | •(CF <sub>3</sub> ) <sub>12</sub> Form                                                                                                               |
| 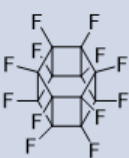                                                                                                                                                                                                                                                                                                                                                                                                        |    |                                                                                                                                                                                                                                                                                                                                       |   |                                                                  |
|                                                                                                                                                                                                                                                                                                                                                                                                        |  |                                                                                                                                                                                                                                                                                                                                      |  |                                                                 |
|                                                                                                                                                                                                                                                                                                                                                                                                        |  |                                                                                                                                                                                                                                                                                                                                      |  |                                                                 |
| Other Patterns: F <sub>8</sub> (F- <i>i</i> Pr) <sub>4</sub> , F <sub>9</sub> (OMe) <sub>3</sub> , F <sub>8</sub> (CN) <sub>4</sub> , F <sub>6</sub> (OMe) <sub>6</sub> , F <sub>6</sub> (CN) <sub>6</sub> , (CN) <sub>6</sub> (OMe) <sub>6</sub> , <b>F<sub>8</sub>[(CH<sub>2</sub>)<sub>2</sub>]<sub>2</sub></b> , [(CH <sub>2</sub> ) <sub>2</sub> ] <sub>3</sub> , [(CH <sub>2</sub> ) <sub>3</sub> ] <sub>3</sub> , F <sub>3</sub> [(CH <sub>2</sub> ) <sub>3</sub> ] <sub>3</sub> . |                                                                                     | Other Patterns: (CH <sub>3</sub> ) <sub>2</sub> , ( <i>i</i> Pr) <sub>2</sub> , ( <i>t</i> Bu) <sub>6</sub> , (CF <sub>3</sub> ) <sub>2</sub> , (CF <sub>3</sub> ) <sub>6</sub> , F <sub>4</sub> (CN) <sub>2</sub> (OMe) <sub>3</sub> , F <sub>3</sub> (OMe) <sub>3</sub> , F <sub>3</sub> (OMe) <sub>3</sub> , (CN) <sub>3</sub> (OMe) <sub>3</sub> , F <sub>6</sub> [(CH <sub>2</sub> ) <sub>2</sub> ] <sub>3</sub> . |                                                                                      | Other Patterns: (CH <sub>3</sub> ) <sub>4</sub> , ( <i>i</i> Pr) <sub>4</sub> , (CF <sub>3</sub> ) <sub>4</sub> , (CF <sub>3</sub> ) <sub>12</sub> . |

**Figure S2.** Results of molecular mechanics calculations performed for [6]-prismane derivatives.

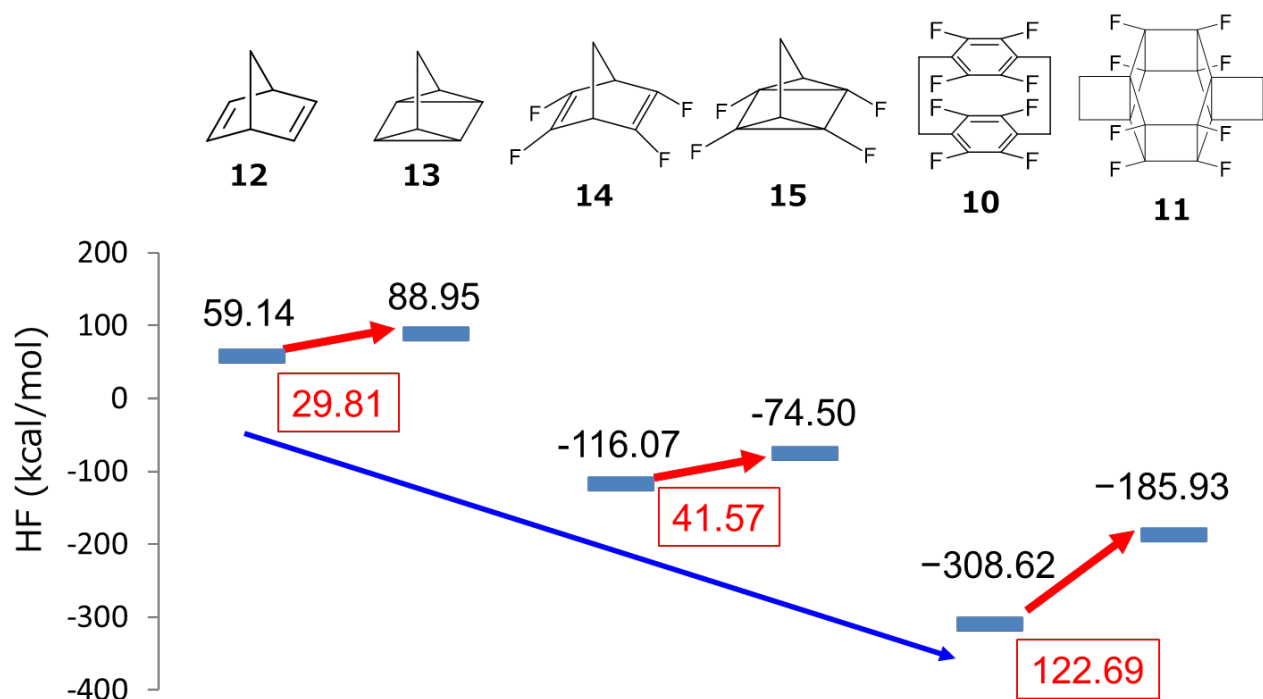

**Figure S3.** Heat of Formation for selected prismane derivatives and their precursors.

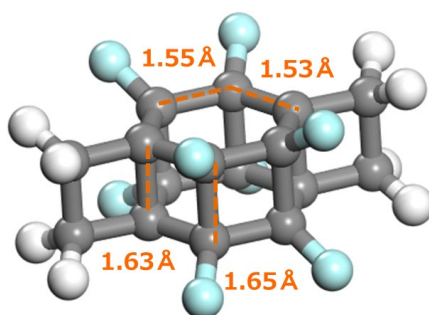

**Figure S4.** C...C distances in **11** optimised by MOPAC PM7.

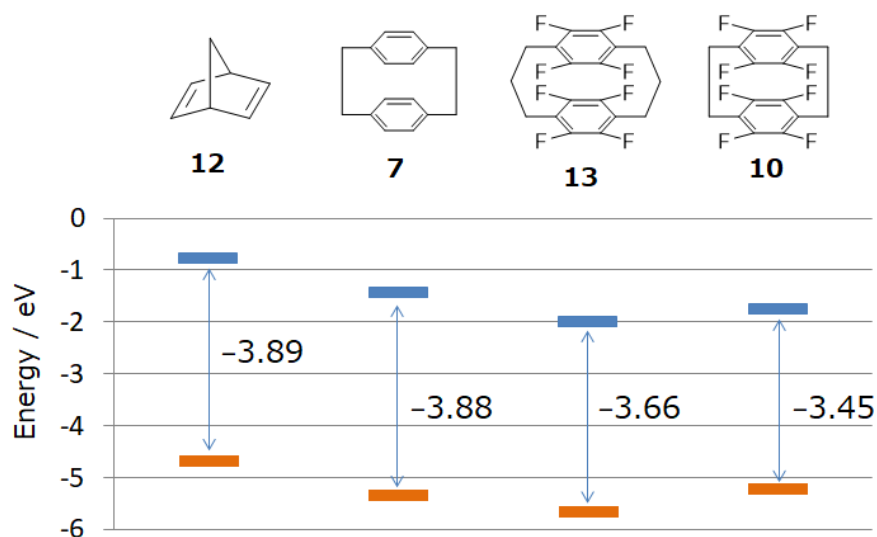

**Figure S5.** Highest occupied molecular orbital (HOMO)–LUMO gaps of selected cyclophanes.

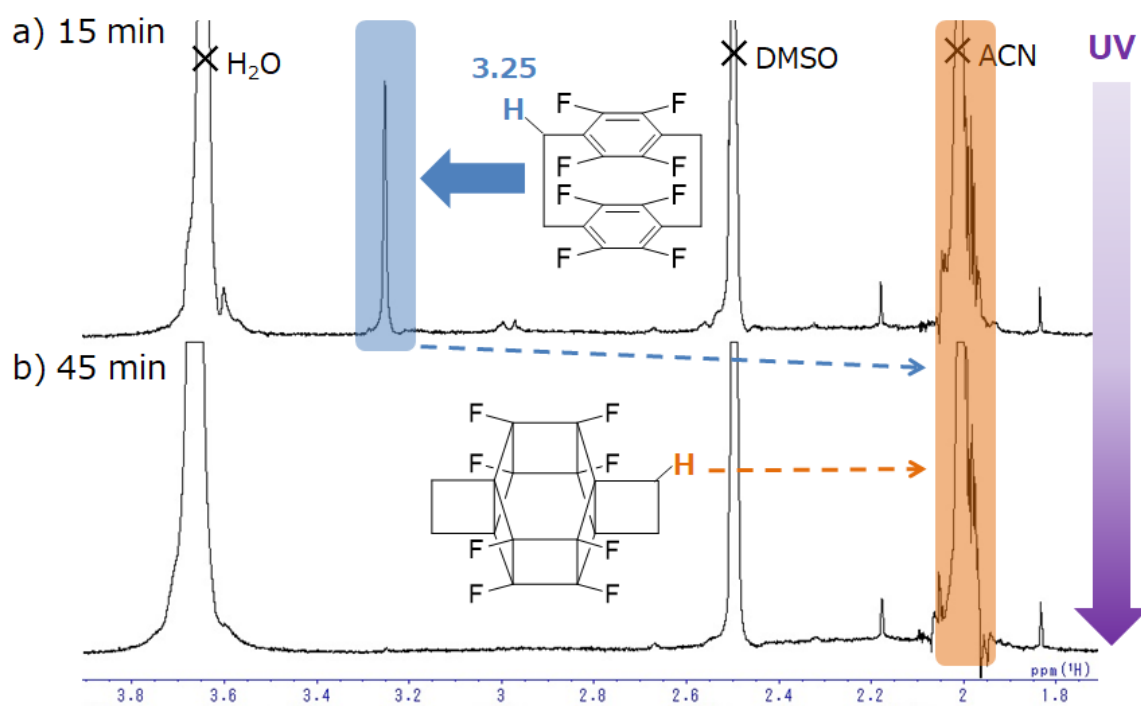

**Figure S6.**  $^1\text{H}$  NMR spectra (400 MHz,  $\text{CD}_3\text{CN}/\text{D}_2\text{O}/(\text{CD}_3)_2\text{SO} = 2/1/8$ , v/v/v) of **10** recorded after (a) 15 and (b) 45 min irradiation.

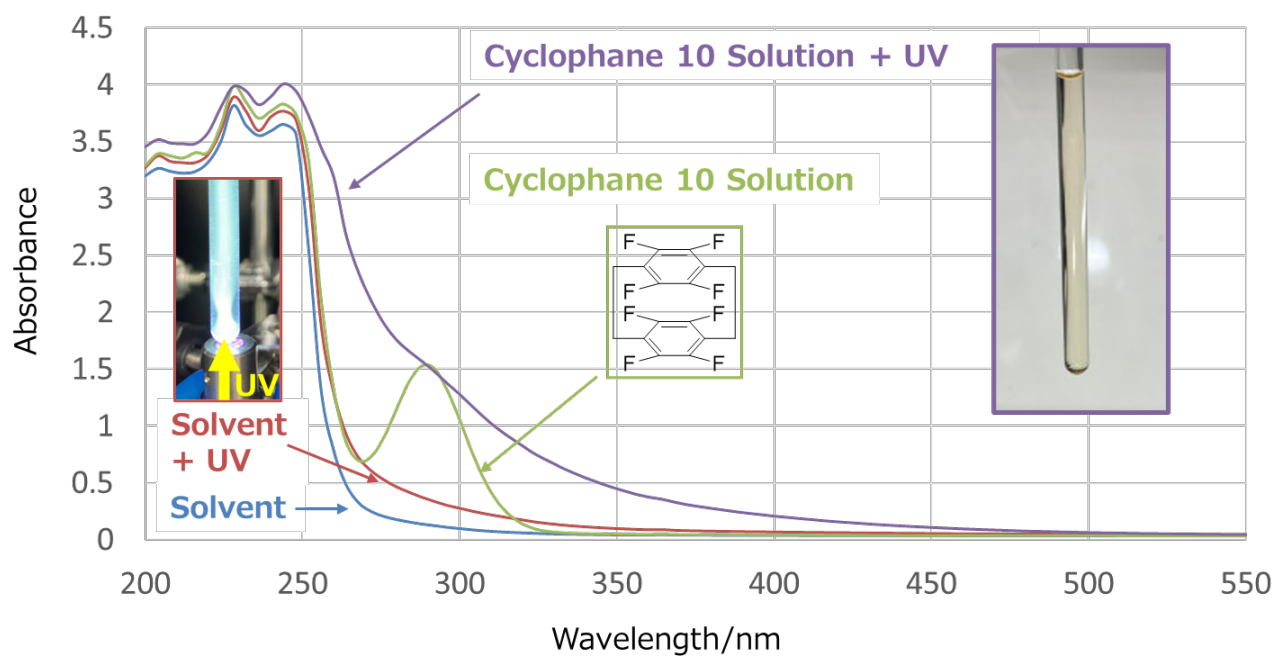

**Figure S7.** Ultraviolet (UV)-Vis spectra of selected reaction systems.

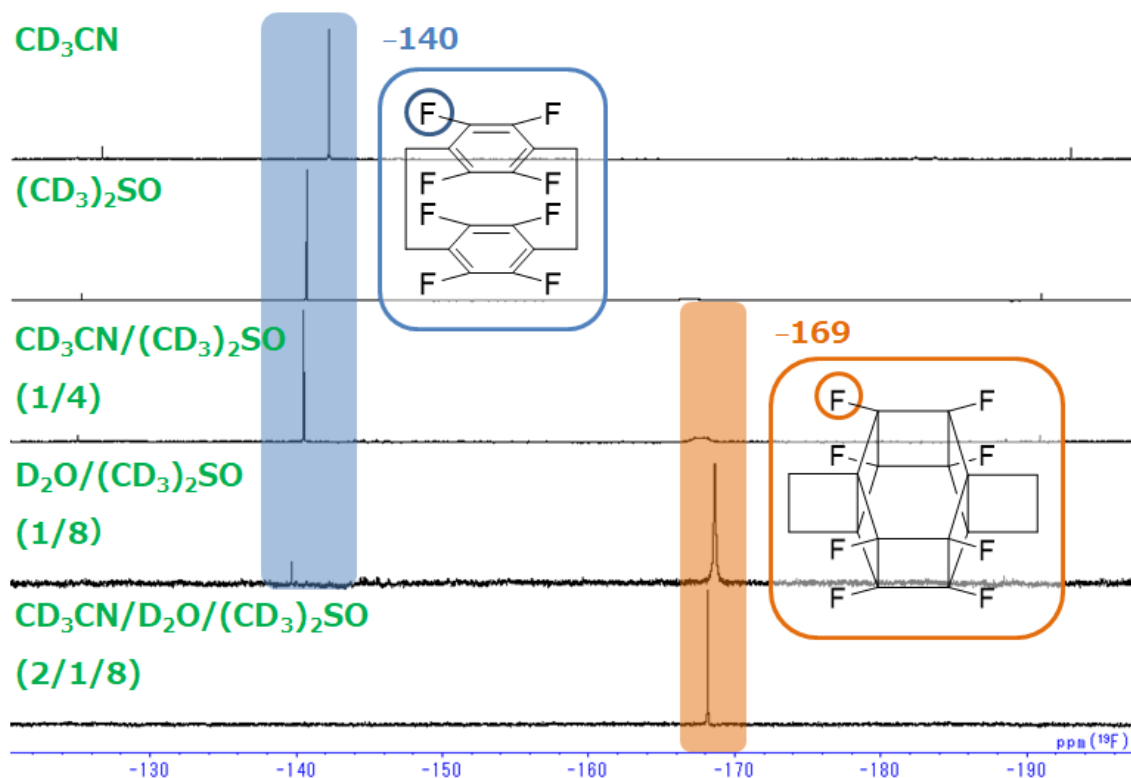

**Figure S8.**  $^{19}\text{F}$  NMR spectra (373 MHz) of **10** photoirradiated in different solvents.

**(a) CD<sub>3</sub>CN/H<sub>2</sub>O/DMSO-d<sub>6</sub>**

**<sup>19</sup>F**

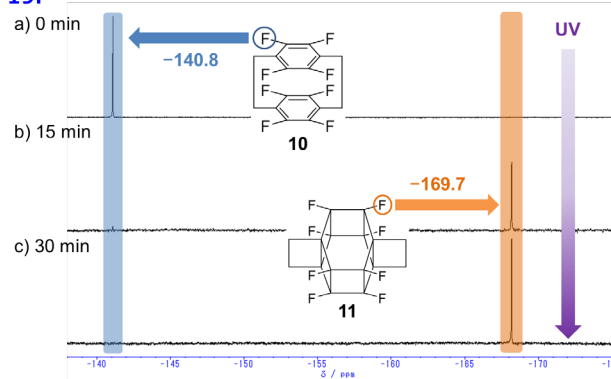

**<sup>1</sup>H**

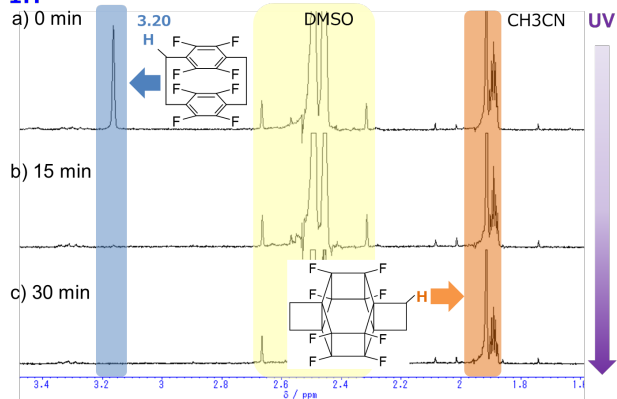

**(b) D<sub>2</sub>O/DMSO-d<sub>6</sub>**

**<sup>19</sup>F**

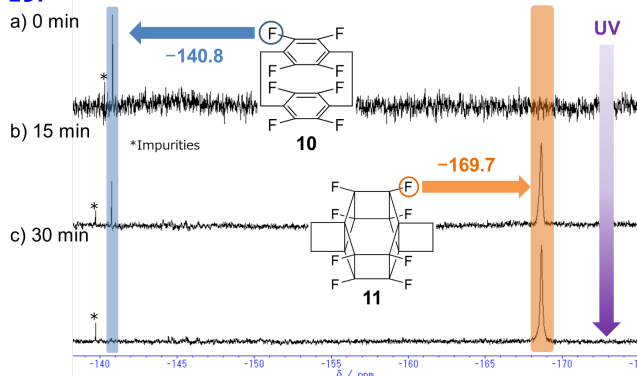

**<sup>1</sup>H**

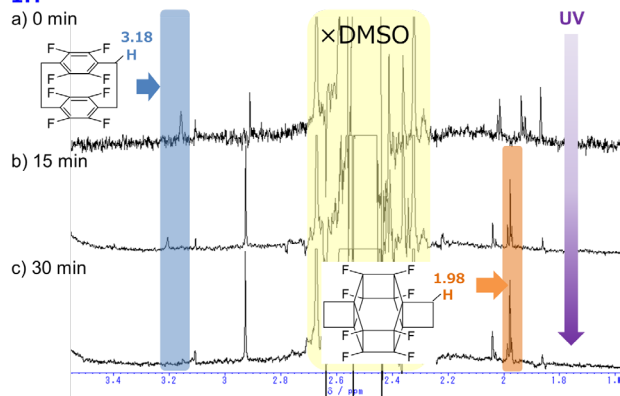

**Figure S9.** NMR spectra (400 MHz) of **10** in (a) CD<sub>3</sub>CN/D<sub>2</sub>O/DMSO-*d*<sub>6</sub> and (b) D<sub>2</sub>O/DMSO-*d*<sub>6</sub>.

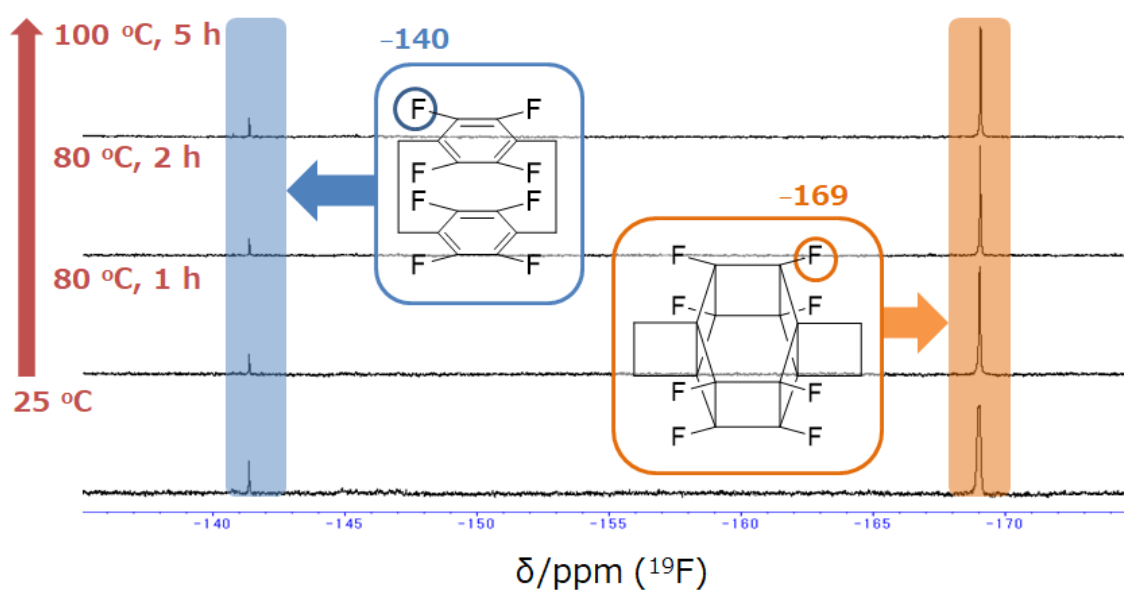

**Figure S10.**  $^{19}\text{F}$  NMR spectra (373 MHz) of the photoreaction mixture recorded before and after heating.

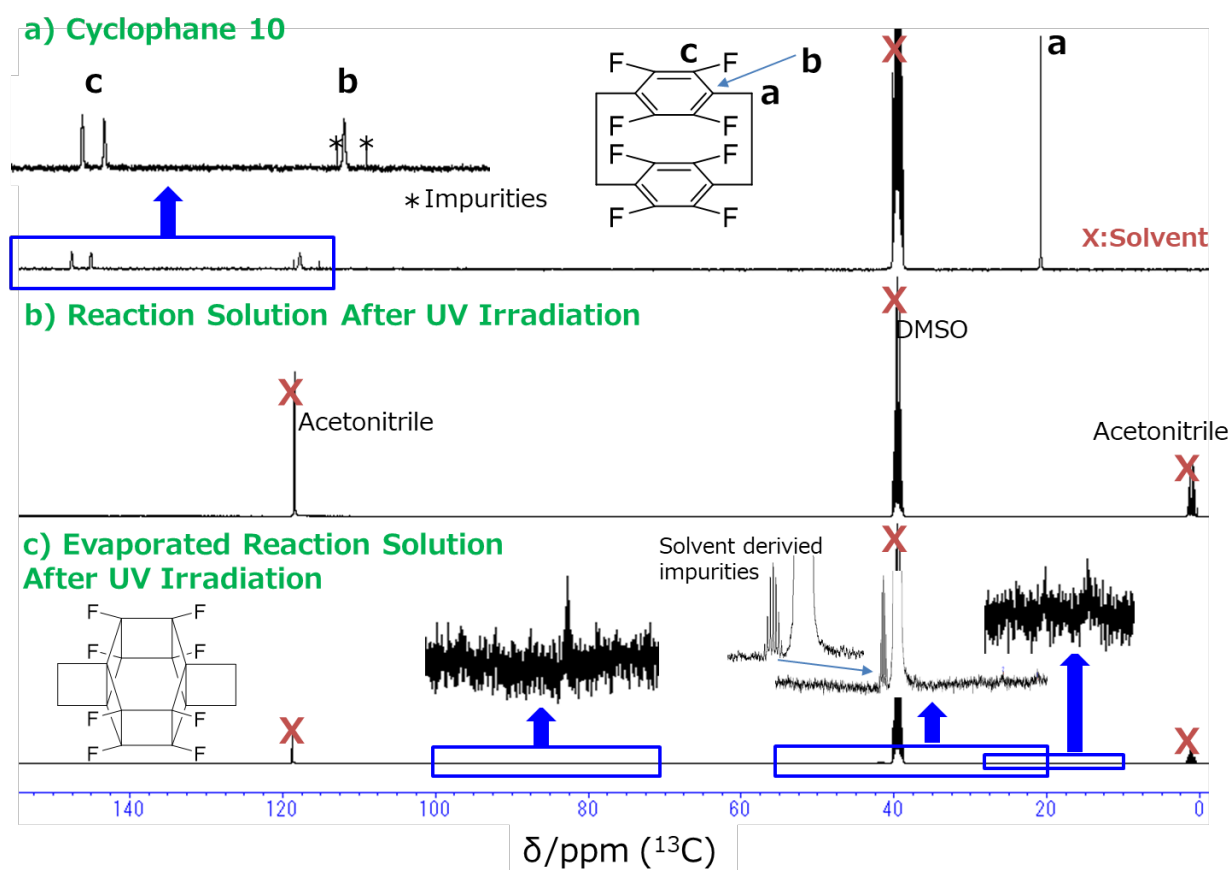

**Figure S11.**  $^{13}\text{C}$  NMR spectra (100 MHz) of (a) **10**, (b) reaction solution after UV irradiation, and (c) evaporated reaction solution.



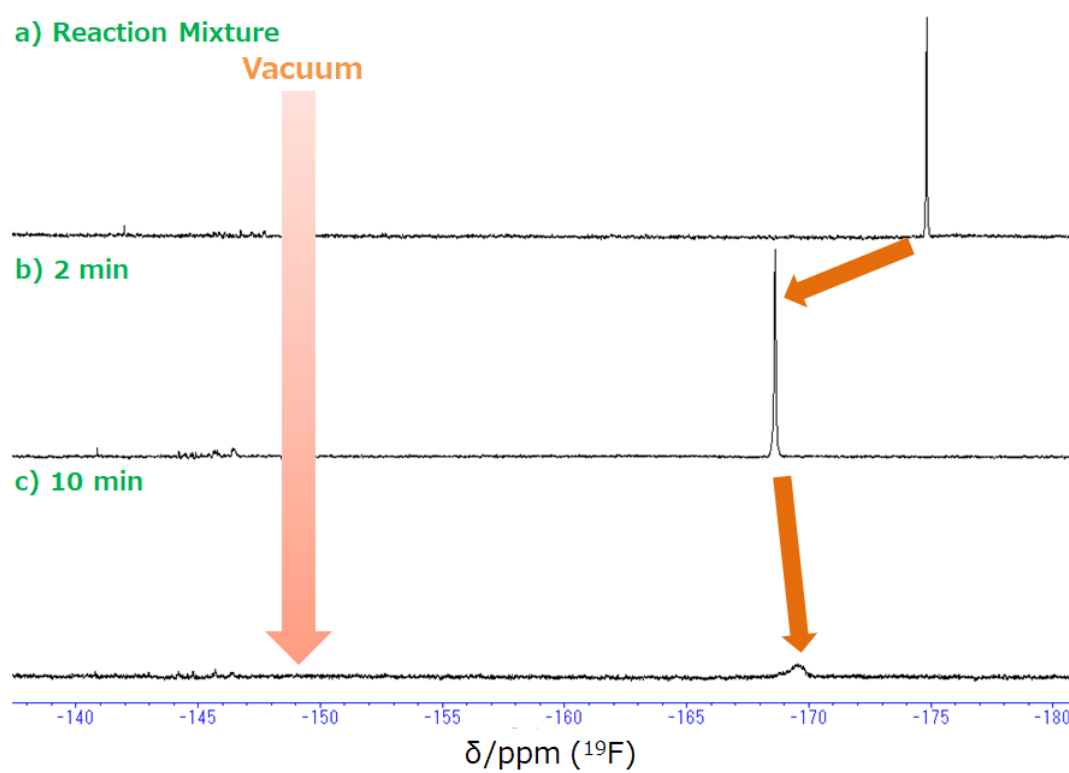

**Figure S12.**  $^{19}\text{F}$  NMR spectra (373 MHz) of the reaction solution kept under vacuum for (a) 0, (b) 2, and (c) 10 min.

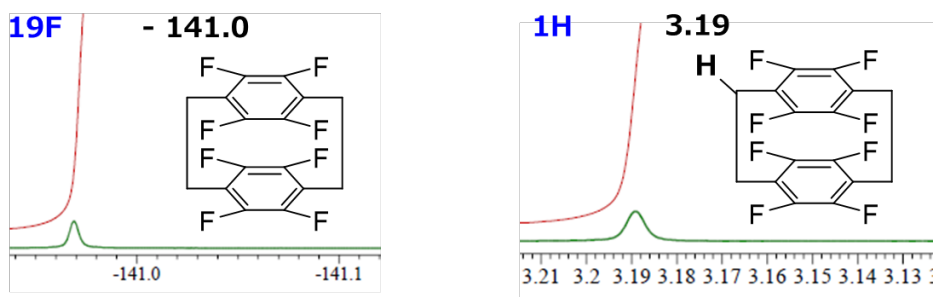

**$^{13}\text{C}\{^1\text{H}, ^{19}\text{F}\}$**

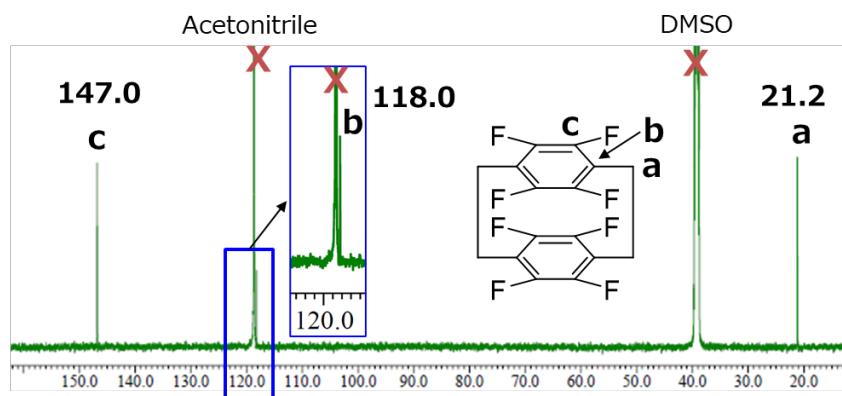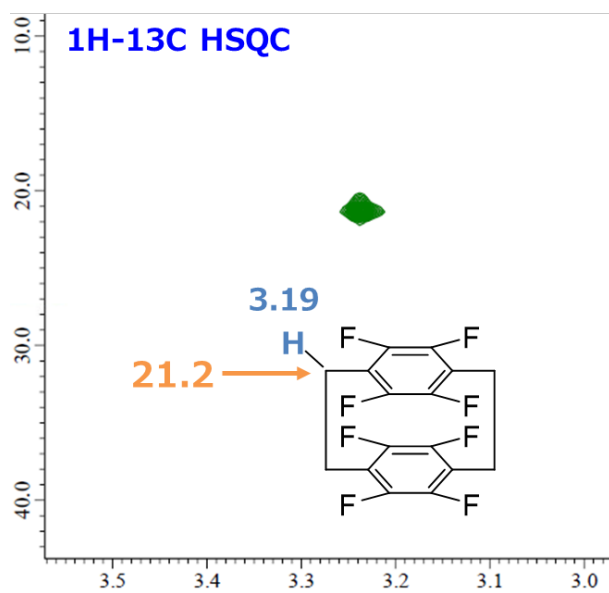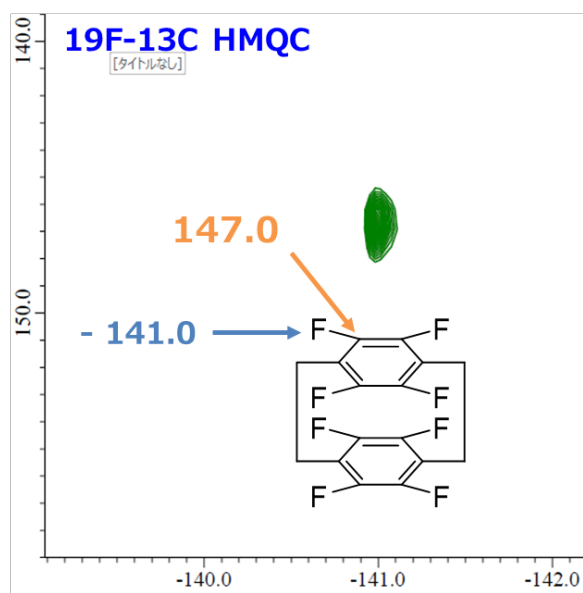

**Figure S13.** NMR spectra of cyclophane **10** assigned by ROYAL probe HFX at 25 °C. Data points for  $^1\text{H}$ : 16 k,  $^{19}\text{F}$ : 32 k,  $^{13}\text{C}\{^1\text{H}, ^{19}\text{F}\}$ : 32 k,  $^1\text{H}$ - $^{13}\text{C}$  HSQC: 1024 x 128,  $^{19}\text{F}$ - $^{13}\text{C}$  HMQC: 1024 x 64. Scans for  $^1\text{H}$  and  $^{19}\text{F}$ : 8,  $^{13}\text{C}\{^1\text{H}, ^{19}\text{F}\}$ : 11 k,  $^1\text{H}$ - $^{13}\text{C}$  HSQC: 4,  $^{19}\text{F}$ - $^{13}\text{C}$  HMQC: 4.

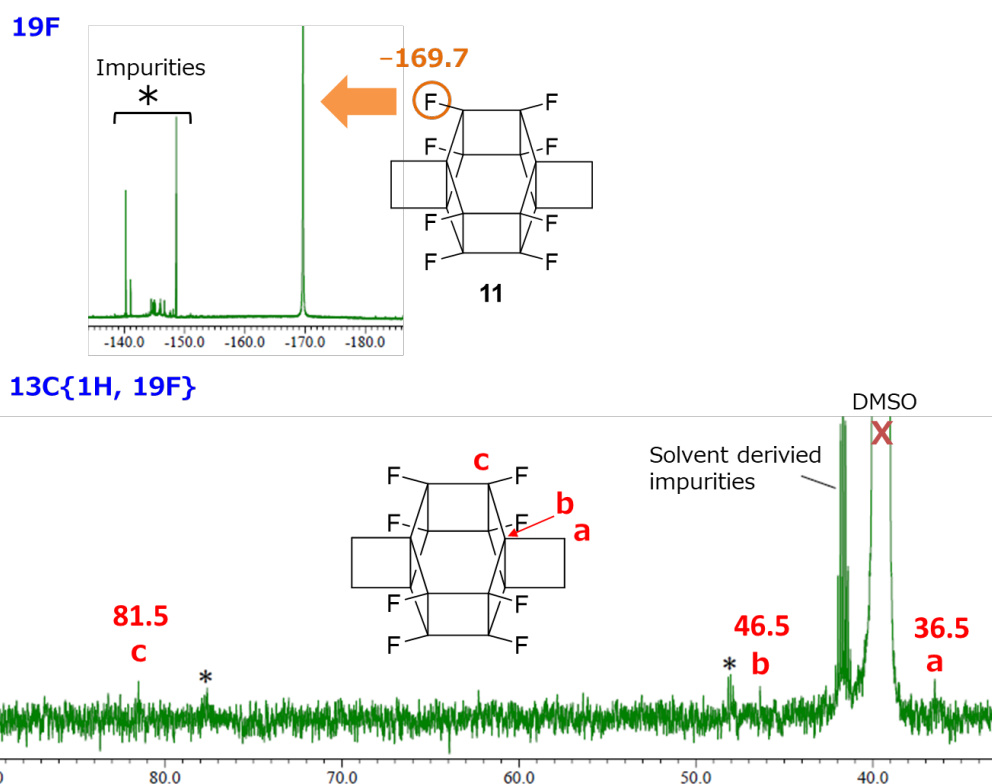

**Figure S14.** NMR spectra of **11** by ROYAL probe HFX at 25 °C. Data points for  $^1\text{H}\{^{19}\text{F}\}$ : 20,480,  $^{19}\text{F}\{^1\text{H}\}$ : 65,536,  $^{13}\text{C}\{^1\text{H}, ^{19}\text{F}\}$ : 47,162. Scans for  $^1\text{H}\{^{19}\text{F}\}$ : 1024,  $^{19}\text{F}\{^1\text{H}\}$ : 1024,  $^{13}\text{C}\{^1\text{H}, ^{19}\text{F}\}$ : 65,536.

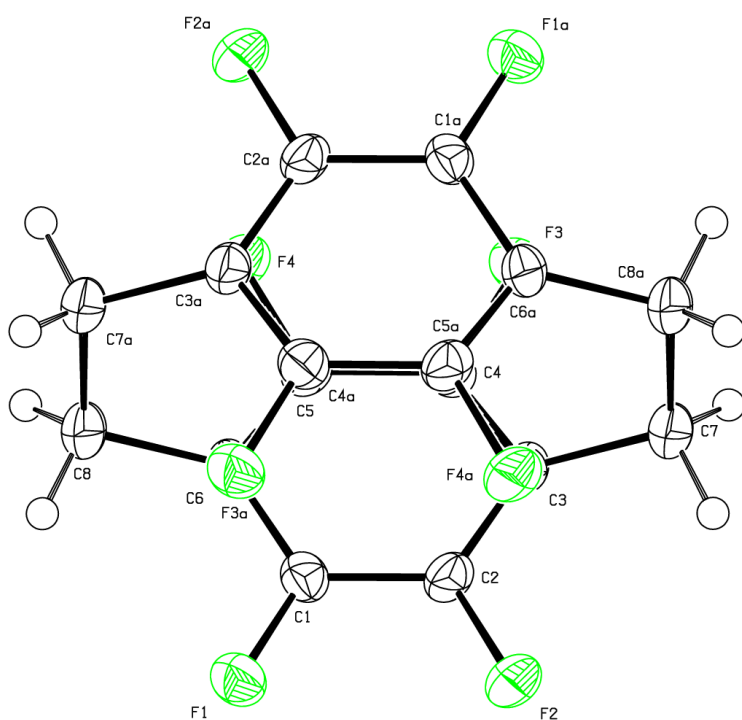

**Figure S15.** ORTEP drawing of **10** (50% probability).

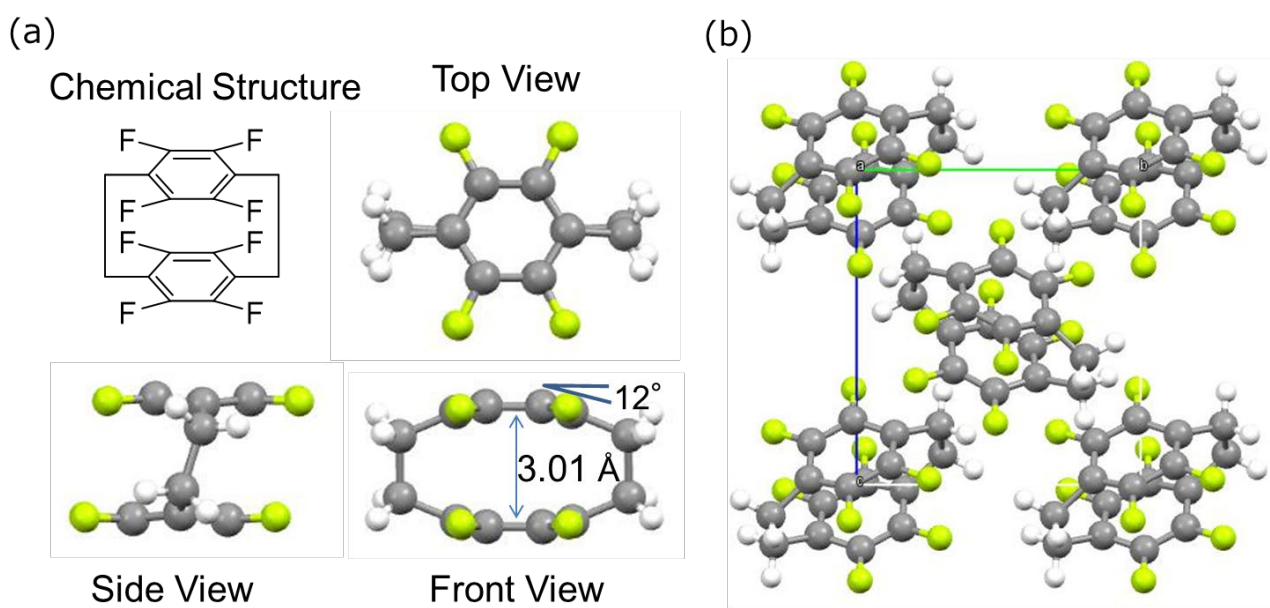

**Figure S16.** (a) Single-molecule and (b) packing (*a*-axis) structures of **10**. Colourless, platelets,  $C_{16}H_8F_8$ ,  $M = 352.23$ , monoclinic,  $P2_1/n$  (#14),  $a = 8.5348(10)$  Å,  $b = 8.1715(11)$  Å,  $c = 9.1344(13)$  Å,  $\beta = 96.829(4)^\circ$ ,  $V = 632.54(14)$  Å<sup>3</sup>,  $Z = 2$ ,  $D_{\text{calc}} = 1.849$  g/cm<sup>3</sup>,  $\mu = 1.898$  cm<sup>-1</sup>,  $R$  ( $wR$ ) = 0.0811 (0.1994) for 1440 reflections. CCDC Deposition Number: 2003703.

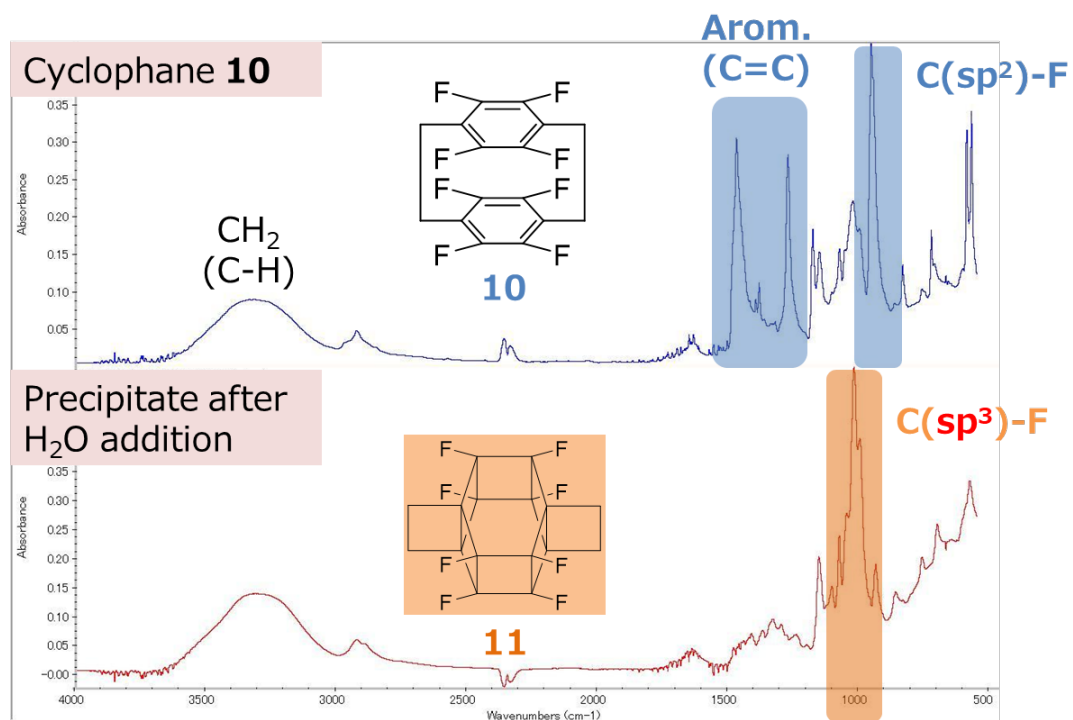

**Figure S17.** Infrared spectra of **10** and the recovered precipitate.

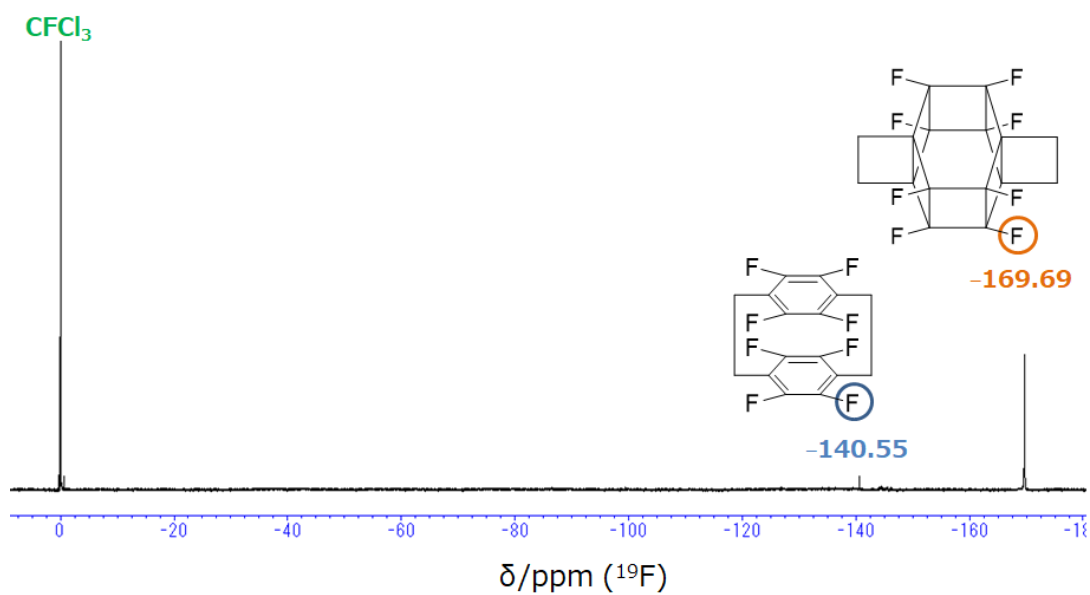

**Figure S18.** <sup>19</sup>F NMR (373 MHz) spectrum of the photoreaction solution with a CFCI<sub>3</sub> standard.

**Table S1.** Cartesian coordinates of the PM7 optimized geometry of norbornadiene **12** (in Å).

| NO. | ATOM | X            | Y            | Z            |
|-----|------|--------------|--------------|--------------|
| 1   | C    | -7.101317826 | 0.928463820  | 0.175665950  |
| 2   | C    | -6.710551195 | -0.135217724 | -0.859277263 |
| 3   | C    | -5.317990056 | 0.290631548  | -1.343653094 |
| 4   | C    | -4.471287619 | 0.179464601  | -0.303137916 |
| 5   | C    | -6.254568531 | 0.817282463  | 1.216142083  |
| 6   | C    | -5.277184219 | -0.323470085 | 0.902182242  |
| 7   | C    | -6.272951256 | -1.282707104 | 0.136028837  |
| 8   | H    | -7.909792764 | 1.603455599  | 0.010354579  |
| 9   | H    | -7.445543553 | -0.383937383 | -1.617551460 |
| 10  | H    | -5.145745295 | 0.614969570  | -2.344555315 |
| 11  | H    | -3.428365322 | 0.389737572  | -0.234030718 |
| 12  | H    | -6.192317460 | 1.378195906  | 2.120717632  |
| 13  | H    | -4.719019995 | -0.742084413 | 1.733060189  |
| 14  | H    | -5.784274138 | -2.127703803 | -0.351879033 |
| 15  | H    | -7.086166444 | -1.662097084 | 0.757053834  |

**Table S2.** Cartesian coordinates of the PM7 optimized geometry of quadricyclane **13** (in Å).

| NO. | ATOM | X            | Y            | Z            |
|-----|------|--------------|--------------|--------------|
| 1   | C    | -5.560738385 | 1.483308628  | -1.764834230 |
| 2   | C    | -5.262503158 | 2.198369600  | -0.443988144 |
| 3   | C    | -5.293119332 | 0.667885506  | -0.481961980 |
| 4   | C    | -6.795832071 | 0.294953635  | -0.405562659 |
| 5   | C    | -7.063435872 | 1.110346226  | -1.688400683 |
| 6   | C    | -7.533005529 | 1.634941243  | -0.328507945 |
| 7   | C    | -6.568403045 | 2.715635570  | 0.157226597  |
| 8   | H    | -5.016063493 | 1.563434976  | -2.673340858 |
| 9   | H    | -4.356044990 | 2.756805594  | -0.278123513 |
| 10  | H    | -4.504701202 | 0.005088128  | -0.221958651 |
| 11  | H    | -7.155211675 | -0.652645968 | -0.087163393 |
| 12  | H    | -7.666676277 | 0.905578394  | -2.538462033 |
| 13  | H    | -8.574767986 | 1.709872166  | -0.063697267 |
| 14  | H    | -6.527088560 | 2.774584248  | 1.255818587  |
| 15  | H    | -6.835507151 | 3.713988180  | -0.222172614 |

**Table S3.** Cartesian coordinates of the PM7 optimized geometry of fluorinated norbornadiene **14** (in Å).

| NO. | ATOM | X            | Y            | Z            |
|-----|------|--------------|--------------|--------------|
| 1   | C    | -7.065374054 | 1.052923231  | 0.157011271  |
| 2   | C    | -6.684782851 | -0.000888288 | -0.885623041 |
| 3   | C    | -5.289613135 | 0.417949005  | -1.355441633 |
| 4   | C    | -4.440384648 | 0.305936206  | -0.311877360 |
| 5   | C    | -6.216089965 | 0.941543573  | 1.200562738  |
| 6   | C    | -5.232338188 | -0.191718598 | 0.899572986  |
| 7   | C    | -6.236115686 | -1.143498960 | 0.120905665  |
| 8   | F    | -8.054779586 | 1.884766135  | -0.021997656 |
| 9   | H    | -7.423267464 | -0.254199771 | -1.646353099 |
| 10  | F    | -5.055256495 | 0.813523419  | -2.576734249 |
| 11  | F    | -3.162483717 | 0.563449343  | -0.251279754 |
| 12  | F    | -6.161643562 | 1.637443957  | 2.303190253  |
| 13  | H    | -4.673307201 | -0.615234840 | 1.734130818  |
| 14  | H    | -5.750007548 | -1.994139289 | -0.365620270 |
| 15  | H    | -7.050053634 | -1.528963306 | 0.741863057  |

**Table S4.** Cartesian coordinates of the PM7 optimized geometry of fluorinated quadricyclane **15** (in Å).

| NO. | ATOM | X            | Y            | Z            |
|-----|------|--------------|--------------|--------------|
| 1   | C    | -5.394730613 | 1.472595175  | -1.810959559 |
| 2   | C    | -5.195649683 | 2.187674664  | -0.465259721 |
| 3   | C    | -5.126563397 | 0.653315653  | -0.519249007 |
| 4   | C    | -6.602455424 | 0.177185779  | -0.514975420 |
| 5   | C    | -6.870492701 | 0.996464311  | -1.806695794 |
| 6   | C    | -7.442783189 | 1.462727808  | -0.458737441 |
| 7   | C    | -6.565866241 | 2.594652339  | 0.077417965  |
| 8   | F    | -4.677816036 | 1.640316555  | -2.888555047 |
| 9   | H    | -4.337876288 | 2.809090732  | -0.249481499 |
| 10  | F    | -4.112215538 | -0.087531231 | -0.164821880 |
| 11  | F    | -6.990898858 | -1.016299365 | -0.157148566 |
| 12  | F    | -7.556282778 | 0.711488556  | -2.879869734 |
| 13  | H    | -8.500850568 | 1.466062256  | -0.237573989 |
| 14  | H    | -6.578478642 | 2.644579721  | 1.179942990  |
| 15  | H    | -6.885576097 | 3.582200997  | -0.297662850 |

**Table S5.** Cartesian coordinates of the PM7 optimized geometry of cyclophane **10** (in Å).

| NO. | ATOM | X            | Y            | Z            |
|-----|------|--------------|--------------|--------------|
| 1   | C    | -5.269857471 | 0.637797419  | -0.675458665 |
| 2   | C    | -5.219822419 | -0.758013599 | -0.774322948 |
| 3   | C    | -4.704890812 | -1.543777147 | 0.264564962  |
| 4   | C    | -4.562429891 | -0.895354684 | 1.497990735  |
| 5   | C    | -4.612420593 | 0.500459529  | 1.596918561  |
| 6   | C    | -4.806911929 | 1.304117961  | 0.466302058  |
| 7   | F    | -4.352301896 | 1.053467321  | 2.765727627  |
| 8   | F    | -4.257777253 | -1.587782703 | 2.578381259  |
| 9   | F    | -5.653570693 | 1.325272401  | -1.733590079 |
| 10  | F    | -5.558962820 | -1.315273848 | -1.920567295 |
| 11  | C    | -1.744267339 | 0.663780120  | 0.772206363  |
| 12  | C    | -1.693758444 | -0.732178580 | 0.675771760  |
| 13  | C    | -2.156261416 | -1.400622858 | -0.464890875 |
| 14  | C    | -2.350804373 | -0.599045935 | -1.596914192 |
| 15  | C    | -2.401578849 | 0.796923584  | -1.500432067 |
| 16  | C    | -2.259578114 | 1.447450581  | -0.268114561 |
| 17  | F    | -2.706210800 | 1.486720142  | -2.582501552 |
| 18  | F    | -2.610064350 | -1.154094034 | -2.764864921 |
| 19  | F    | -1.404865437 | 1.223576880  | 1.917205499  |
| 20  | F    | -1.309319318 | -1.418088928 | 1.734666054  |
| 21  | C    | -4.134773927 | -2.899976826 | 0.017573288  |
| 22  | C    | -4.336181785 | 2.718762140  | 0.415141263  |
| 23  | C    | -2.830380611 | 2.803784908  | -0.023221287 |
| 24  | C    | -2.626401460 | -2.815392156 | -0.412074351 |
| 25  | H    | -4.216261210 | -3.546021363 | 0.915994203  |
| 26  | H    | -4.701270148 | -3.443230093 | -0.766704858 |
| 27  | H    | -4.948066121 | 3.326376093  | -0.283161354 |
| 28  | H    | -4.453100618 | 3.222798744  | 1.396714234  |
| 29  | H    | -2.260198509 | 3.351008188  | 0.755712075  |
| 30  | H    | -2.754947087 | 3.446209663  | -0.924785878 |
| 31  | H    | -2.018405677 | -3.420759859 | 0.291554948  |
| 32  | H    | -2.503413699 | -3.322208214 | -1.391462096 |



**Table S6.** Cartesian coordinates of the PM7 optimized geometry of prismane **11** (in Å).

| NO. | ATOM | X            | Y            | Z            |
|-----|------|--------------|--------------|--------------|
| 1   | C    | -0.412676373 | 1.281677479  | -0.373296389 |
| 2   | C    | -2.062293736 | 0.373096988  | -1.624013025 |
| 3   | C    | -3.061168323 | -0.331246656 | -0.710549391 |
| 4   | C    | -0.554659778 | 0.067170124  | -1.481955773 |
| 5   | C    | -1.920359798 | 1.587626498  | -0.515364567 |
| 6   | C    | -2.920881492 | 0.869354481  | 0.385457076  |
| 7   | C    | -2.453467164 | -0.132664756 | 1.437209128  |
| 8   | C    | -1.087796612 | -1.653064176 | 0.470638984  |
| 9   | C    | -0.087320197 | -0.934809450 | -0.430266868 |
| 10  | C    | -2.595434028 | -1.347117473 | 0.328460602  |
| 11  | C    | -0.945826946 | -0.438579150 | 1.579364438  |
| 12  | C    | 0.053070239  | 0.265798110  | 0.665755661  |
| 13  | F    | 0.125865584  | 0.114938925  | -2.610097558 |
| 14  | F    | 0.382488648  | 2.306344399  | -0.609642566 |
| 15  | F    | -2.457159622 | 0.639097303  | -2.853385460 |
| 16  | F    | -0.550721305 | -0.704959033 | 2.808590001  |
| 17  | F    | -0.807106448 | -2.896261308 | 0.807947373  |
| 18  | F    | -3.134755694 | -0.180677318 | 2.564854784  |
| 19  | F    | -3.390498081 | -2.371887115 | 0.564510306  |
| 20  | F    | -2.201365253 | 2.830552930  | -0.853204581 |
| 21  | C    | 1.544837174  | -0.058539300 | 0.787474179  |
| 22  | C    | 1.409352828  | -1.217104537 | -0.270360794 |
| 23  | C    | -4.552931293 | -0.007148842 | -0.832351786 |
| 24  | C    | -4.417608010 | 1.151508756  | 0.225505043  |
| 25  | H    | 1.866102333  | -0.392996186 | 1.779902808  |
| 26  | H    | 2.220114230  | 0.748899887  | 0.484003467  |
| 27  | H    | 1.653582905  | -2.211228606 | 0.119597009  |
| 28  | H    | 2.007252107  | -1.069271027 | -1.176290764 |
| 29  | H    | -4.874090674 | 0.327207899  | -1.824854852 |
| 30  | H    | -5.228134161 | -0.814617565 | -0.529042279 |
| 31  | H    | -5.015784829 | 1.003659674  | 1.131200405  |
| 32  | H    | -4.661930336 | 2.145478784  | -0.164706984 |

**Table S7.** Cartesian coordinates of the PM7 optimized geometry of cyclophane **7** (in Å).

| NO. | ATOM | X            | Y            | Z            |
|-----|------|--------------|--------------|--------------|
| 1   | C    | -5.269703583 | 0.637811050  | -0.675506783 |
| 2   | C    | -5.219961380 | -0.750389220 | -0.773827474 |
| 3   | C    | -4.697330636 | -1.500217507 | 0.285343831  |
| 4   | C    | -4.551942000 | -0.890128599 | 1.535916088  |
| 5   | C    | -4.601706588 | 0.498122857  | 1.634312448  |
| 6   | C    | -4.796454108 | 1.266232986  | 0.481372037  |
| 7   | H    | -4.402487318 | 0.983289044  | 2.585867823  |
| 8   | H    | -4.313872608 | -1.489143676 | 2.410532038  |
| 9   | H    | -5.591703536 | 1.231936653  | -1.526225559 |
| 10  | H    | -5.503191458 | -1.240219397 | -1.701331419 |
| 11  | C    | -1.728821121 | 0.661411142  | 0.811071518  |
| 12  | C    | -1.678640668 | -0.726960820 | 0.714824969  |
| 13  | C    | -2.149567857 | -1.357180157 | -0.441937524 |
| 14  | C    | -2.342383525 | -0.590860036 | -1.596391473 |
| 15  | C    | -2.392825760 | 0.797465690  | -1.500092905 |
| 16  | C    | -2.249818536 | 1.409419185  | -0.250137427 |
| 17  | H    | -2.629177498 | 1.394955066  | -2.376209727 |
| 18  | H    | -2.539236692 | -1.077467562 | -2.547614496 |
| 19  | H    | -1.447521036 | 1.152782624  | 1.738392672  |
| 20  | H    | -1.358162728 | -1.319927340 | 1.566973797  |
| 21  | C    | -4.127066115 | -2.863676756 | 0.037816001  |
| 22  | C    | -4.326026279 | 2.688125038  | 0.431256496  |
| 23  | C    | -2.821033926 | 2.773061679  | -0.005641852 |
| 24  | C    | -2.619627274 | -2.779163034 | -0.390786201 |
| 25  | H    | -4.208763894 | -3.496061873 | 0.941851306  |
| 26  | H    | -4.695638102 | -3.392177514 | -0.750390465 |
| 27  | H    | -4.938739989 | 3.281997035  | -0.272859161 |
| 28  | H    | -4.442329381 | 3.177396358  | 1.416700388  |
| 29  | H    | -2.249060102 | 3.306275507  | 0.777001627  |
| 30  | H    | -2.745294669 | 3.401143613  | -0.913236399 |
| 31  | H    | -2.010655747 | -3.371119031 | 0.318189328  |
| 32  | H    | -2.497632943 | -3.270813232 | -1.374313273 |

**Table S8.** Cartesian coordinates of the PM7 optimized geometry of cyclophane **16** (in Å).

| NO. | ATOM | X            | Y            | Z            |
|-----|------|--------------|--------------|--------------|
| 1   | C    | -6.640698517 | -0.372018230 | -0.472126500 |
| 2   | C    | -5.905883962 | -1.554511159 | -0.617661820 |
| 3   | C    | -5.008400146 | -1.995522732 | 0.361115563  |
| 4   | C    | -5.045016938 | -1.291512823 | 1.569238943  |
| 5   | C    | -5.819150631 | -0.136778404 | 1.732951814  |
| 6   | C    | -6.562305100 | 0.413297786  | 0.682701879  |
| 7   | F    | -5.806563126 | 0.446983538  | 2.916637067  |
| 8   | F    | -4.316634576 | -1.689241970 | 2.595946764  |
| 9   | F    | -7.401912609 | 0.002059172  | -1.483751074 |
| 10  | F    | -6.062077276 | -2.239682284 | -1.734818646 |
| 11  | C    | -4.220169067 | 1.341756648  | -1.592757057 |
| 12  | C    | -3.446524467 | 0.186697433  | -1.756692746 |
| 13  | C    | -2.703320020 | -0.363798455 | -0.706697855 |
| 14  | C    | -2.624581155 | 0.421433919  | 0.448241625  |
| 15  | C    | -3.359642798 | 1.603730551  | 0.594300466  |
| 16  | C    | -4.257002044 | 2.045188197  | -0.384344780 |
| 17  | F    | -3.203512509 | 2.288636562  | 1.711715268  |
| 18  | F    | -1.863173734 | 0.046788106  | 1.459558018  |
| 19  | F    | -4.948367521 | 1.739565057  | -2.619518637 |
| 20  | F    | -3.459406169 | -0.396669990 | -2.940516411 |
| 21  | C    | -4.055504888 | -3.117251044 | 0.118358327  |
| 22  | C    | -7.198416226 | 1.759252091  | 0.778000261  |
| 23  | C    | -5.210125948 | 3.166784834  | -0.141427413 |
| 24  | C    | -2.067700637 | -1.709999867 | -0.802628800 |
| 25  | C    | -3.077096882 | -2.849730766 | -1.042057609 |
| 26  | C    | -6.189293640 | 2.899139538  | 1.018242514  |
| 27  | H    | -4.627689190 | -4.047576860 | -0.104243077 |
| 28  | H    | -3.468081864 | -3.363182901 | 1.028133911  |
| 29  | H    | -7.941763457 | 1.759368279  | 1.608643868  |
| 30  | H    | -7.794159531 | 1.998349547  | -0.128171008 |
| 31  | H    | -4.637957303 | 4.097032118  | 0.081826789  |
| 32  | H    | -5.796979946 | 3.413024260  | -1.051502585 |
| 33  | H    | -1.325349152 | -1.710188923 | -1.634171937 |
| 34  | H    | -1.471011378 | -1.949239656 | 0.102950241  |
| 35  | H    | -3.630064134 | -2.684156959 | -1.982754592 |

|    |   |              |              |              |
|----|---|--------------|--------------|--------------|
| 36 | H | -2.500584842 | -3.782539856 | -1.222799434 |
| 37 | H | -5.636788841 | 2.733603127  | 1.959264711  |
| 38 | H | -6.766217221 | 3.831755528  | 1.198644926  |
